# Supplementary material
Source: MDPI journal article supplement (https://www.mdpi.com/2077-1312/3/3/699)
Supplement: s1 [file s1]

**Supplementary Information**

**Table S1**. TRFLP-OUT abundance (%) among nutrient treatments (Ctrl: control; N: Fertilized with nitrogen; P: Fertilized with phosphorus) and depth intervals (0–5 cm, 5–10 cm, 20–30 cm). Data shown as Avgerage ± SE.

| TRLFP OTUs | Ctrl-treatment | | | | | | N-treatment | | | | | | P-treatment | | | | | |
| --- | --- | --- | --- | --- | --- | --- | --- | --- | --- | --- | --- | --- | --- | --- | --- | --- | --- | --- |
|  | 0–5 cm | | 5–10 cm | | 20–30 cm | | 0–5 cm | | 5–10 cm | | 20–30 cm | | 0–5 cm | | 5–10 cm | | 20–30 cm | |
|  | Mean | SE | Mean | SE | Mean | SE | Mean | SE | Mean | SE | Mean | SE | Mean | SE | Mean | SE | Mean | SE |
| 100 | 0.0 | 0.0 | 0.0 | 0.0 | 0.0 | 0.0 | 0.0 | 0.0 | 0.0 | 0.0 | 0.0 | 0.0 | 0.0 | 0.0 | 0.3 | 0.2 | 0.1 | 0.1 |
| 107 | 0.0 | 0.0 | 0.0 | 0.0 | 0.0 | 0.0 | 0.0 | 0.0 | 0.0 | 0.0 | 0.0 | 0.0 | 0.0 | 0.0 | 0.0 | 0.0 | 0.0 | 0.0 |
| 109 | 0.0 | 0.0 | 0.0 | 0.0 | 0.0 | 0.0 | 0.0 | 0.0 | 1.2 | 1.2 | 0.1 | 0.1 | 0.0 | 0.0 | 0.4 | 0.4 | 0.0 | 0.0 |
| 110 | 0.0 | 0.0 | 0.0 | 0.0 | 0.0 | 0.0 | 0.0 | 0.0 | 0.0 | 0.0 | 0.0 | 0.0 | 0.0 | 0.0 | 0.0 | 0.0 | 0.0 | 0.0 |
| 111 | 0.0 | 0.0 | 0.1 | 0.1 | 0.1 | 0.1 | 0.0 | 0.0 | 0.0 | 0.0 | 0.0 | 0.0 | 0.0 | 0.0 | 0.2 | 0.2 | 0.0 | 0.0 |
| 112 | 0.0 | 0.0 | 0.0 | 0.0 | 0.0 | 0.0 | 0.0 | 0.0 | 0.2 | 0.2 | 0.0 | 0.0 | 0.0 | 0.0 | 0.0 | 0.0 | 0.0 | 0.0 |
| 114 | 0.0 | 0.0 | 0.0 | 0.0 | 0.5 | 0.3 | 0.0 | 0.0 | 0.0 | 0.0 | 0.0 | 0.0 | 0.0 | 0.0 | 0.0 | 0.0 | 0.1 | 0.1 |
| 115 | 0.3 | 0.2 | 0.2 | 0.1 | 0.1 | 0.1 | 0.1 | 0.1 | 0.0 | 0.0 | 0.0 | 0.0 | 0.0 | 0.0 | 0.0 | 0.0 | 0.0 | 0.0 |
| 116 | 0.3 | 0.2 | 1.1 | 0.6 | 0.0 | 0.0 | 0.0 | 0.0 | 0.0 | 0.0 | 0.0 | 0.0 | 0.2 | 0.1 | 0.3 | 0.3 | 0.0 | 0.0 |
| 117 | 0.0 | 0.0 | 0.0 | 0.0 | 0.0 | 0.0 | 0.0 | 0.0 | 0.0 | 0.0 | 0.0 | 0.0 | 0.0 | 0.0 | 0.0 | 0.0 | 0.0 | 0.0 |
| 118 | 0.1 | 0.1 | 0.0 | 0.0 | 0.0 | 0.0 | 0.0 | 0.0 | 0.0 | 0.0 | 0.0 | 0.0 | 0.0 | 0.0 | 0.0 | 0.0 | 0.2 | 0.2 |
| 120 | 0.0 | 0.0 | 0.0 | 0.0 | 0.0 | 0.0 | 0.0 | 0.0 | 0.0 | 0.0 | 0.0 | 0.0 | 0.0 | 0.0 | 0.0 | 0.0 | 0.0 | 0.0 |
| 121 | 0.4 | 0.2 | 0.3 | 0.2 | 1.6 | 0.9 | 0.3 | 0.2 | 0.3 | 0.2 | 0.1 | 0.1 | 0.1 | 0.1 | 0.0 | 0.0 | 0.2 | 0.1 |
| 122 | 0.0 | 0.0 | 0.0 | 0.0 | 0.0 | 0.0 | 0.0 | 0.0 | 0.0 | 0.0 | 0.0 | 0.0 | 0.2 | 0.1 | 0.0 | 0.0 | 0.0 | 0.0 |
| 124 | 0.2 | 0.1 | 0.2 | 0.1 | 0.1 | 0.1 | 0.0 | 0.0 | 0.0 | 0.0 | 0.0 | 0.0 | 0.1 | 0.1 | 0.1 | 0.1 | 0.3 | 0.2 |
| 125 | 0.3 | 0.1 | 0.2 | 0.1 | 0.6 | 0.4 | 0.3 | 0.3 | 1.1 | 0.6 | 0.7 | 0.4 | 0.4 | 0.3 | 0.4 | 0.2 | 0.1 | 0.1 |
| 126 | 0.0 | 0.0 | 0.0 | 0.0 | 0.0 | 0.0 | 0.0 | 0.0 | 0.0 | 0.0 | 0.1 | 0.0 | 0.0 | 0.0 | 0.0 | 0.0 | 0.0 | 0.0 |
| 127 | 0.0 | 0.0 | 0.0 | 0.0 | 0.1 | 0.0 | 0.0 | 0.0 | 0.0 | 0.0 | 0.2 | 0.2 | 0.0 | 0.0 | 0.0 | 0.0 | 0.0 | 0.0 |
| 141 | 0.0 | 0.0 | 0.0 | 0.0 | 0.0 | 0.0 | 0.0 | 0.0 | 0.0 | 0.0 | 0.0 | 0.0 | 0.0 | 0.0 | 0.0 | 0.0 | 0.0 | 0.0 |
| 143 | 0.0 | 0.0 | 0.0 | 0.0 | 0.3 | 0.3 | 0.0 | 0.0 | 0.0 | 0.0 | 0.0 | 0.0 | 0.0 | 0.0 | 0.0 | 0.0 | 0.0 | 0.0 |
| 144 | 0.0 | 0.0 | 0.2 | 0.1 | 0.2 | 0.1 | 0.0 | 0.0 | 0.0 | 0.0 | 0.0 | 0.0 | 0.7 | 0.5 | 0.0 | 0.0 | 0.1 | 0.1 |
| 145 | 0.0 | 0.0 | 0.0 | 0.0 | 0.0 | 0.0 | 0.1 | 0.1 | 0.0 | 0.0 | 0.1 | 0.1 | 0.0 | 0.0 | 0.0 | 0.0 | 0.0 | 0.0 |
| 147 | 1.4 | 1.1 | 0.0 | 0.0 | 0.0 | 0.0 | 0.7 | 0.7 | 3.3 | 3.3 | 1.7 | 1.7 | 1.9 | 1.9 | 0.0 | 0.0 | 1.4 | 1.4 |
| 148 | 2.0 | 2.0 | 2.5 | 2.5 | 11.5 | 4.4 | 1.0 | 1.0 | 0.0 | 0.0 | 9.3 | 4.9 | 0.0 | 0.0 | 0.0 | 0.0 | 11.8 | 5.5 |

**Table S1.** *Cont*.

| 149 | 16.9 | 3.9 | 21.1 | 7.4 | 8.1 | 4.3 | 13.7 | 6.8 | 13.8 | 5.3 | 1.9 | 1.9 | 33.2 | 5.4 | 20.3 | 2.9 | 3.2 | 2.3 |
| --- | --- | --- | --- | --- | --- | --- | --- | --- | --- | --- | --- | --- | --- | --- | --- | --- | --- | --- |
| 150 | 3.9 | 2.9 | 1.1 | 0.8 | 9.1 | 3.2 | 12.2 | 9.6 | 3.8 | 2.5 | 6.6 | 4.3 | 1.2 | 1.2 | 4.5 | 4.5 | 5.5 | 1.8 |
| 151 | 0.0 | 0.0 | 0.0 | 0.0 | 0.0 | 0.0 | 0.0 | 0.0 | 0.0 | 0.0 | 0.0 | 0.0 | 0.0 | 0.0 | 0.0 | 0.0 | 0.0 | 0.0 |
| 153 | 0.0 | 0.0 | 1.8 | 1.8 | 0.0 | 0.0 | 0.0 | 0.0 | 0.0 | 0.0 | 0.1 | 0.1 | 0.0 | 0.0 | 0.0 | 0.0 | 0.0 | 0.0 |
| 154 | 16.1 | 3.9 | 15.6 | 5.2 | 3.1 | 1.5 | 5.9 | 2.0 | 11.5 | 4.9 | 1.2 | 0.9 | 8.2 | 2.6 | 6.9 | 3.8 | 2.2 | 1.0 |
| 155 | 0.0 | 0.0 | 0.0 | 0.0 | 0.3 | 0.2 | 0.0 | 0.0 | 0.3 | 0.3 | 2.5 | 1.9 | 0.0 | 0.0 | 0.0 | 0.0 | 0.0 | 0.0 |
| 156 | 0.0 | 0.0 | 0.0 | 0.0 | 0.0 | 0.0 | 0.0 | 0.0 | 0.1 | 0.1 | 0.1 | 0.1 | 0.0 | 0.0 | 0.0 | 0.0 | 0.0 | 0.0 |
| 157 | 0.0 | 0.0 | 0.0 | 0.0 | 0.1 | 0.1 | 0.0 | 0.0 | 0.0 | 0.0 | 0.0 | 0.0 | 0.0 | 0.0 | 0.0 | 0.0 | 0.0 | 0.0 |
| 159 | 0.3 | 0.2 | 0.1 | 0.1 | 0.2 | 0.1 | 0.7 | 0.6 | 0.5 | 0.4 | 0.0 | 0.0 | 0.1 | 0.1 | 0.1 | 0.1 | 0.0 | 0.0 |
| 160 | 0.0 | 0.0 | 0.0 | 0.0 | 0.0 | 0.0 | 0.0 | 0.0 | 0.0 | 0.0 | 0.3 | 0.3 | 0.0 | 0.0 | 0.0 | 0.0 | 0.0 | 0.0 |
| 161 | 0.0 | 0.0 | 0.2 | 0.1 | 0.1 | 0.1 | 0.1 | 0.1 | 0.0 | 0.0 | 0.0 | 0.0 | 0.1 | 0.1 | 0.1 | 0.1 | 0.2 | 0.1 |
| 162 | 0.0 | 0.0 | 0.0 | 0.0 | 0.1 | 0.1 | 0.1 | 0.1 | 0.0 | 0.0 | 0.0 | 0.0 | 0.0 | 0.0 | 0.0 | 0.0 | 0.1 | 0.1 |
| 165 | 0.0 | 0.0 | 0.1 | 0.1 | 0.0 | 0.0 | 0.0 | 0.0 | 0.0 | 0.0 | 0.0 | 0.0 | 0.1 | 0.0 | 0.0 | 0.0 | 0.8 | 0.8 |
| 166 | 0.0 | 0.0 | 0.1 | 0.1 | 0.1 | 0.1 | 0.1 | 0.1 | 0.4 | 0.2 | 0.1 | 0.1 | 0.0 | 0.0 | 0.1 | 0.1 | 0.0 | 0.0 |
| 167 | 0.0 | 0.0 | 0.0 | 0.0 | 0.0 | 0.0 | 0.1 | 0.1 | 0.0 | 0.0 | 0.1 | 0.1 | 0.0 | 0.0 | 0.2 | 0.2 | 0.1 | 0.1 |
| 170 | 0.0 | 0.0 | 0.0 | 0.0 | 0.0 | 0.0 | 0.0 | 0.0 | 0.0 | 0.0 | 0.0 | 0.0 | 0.0 | 0.0 | 0.0 | 0.0 | 0.0 | 0.0 |
| 172 | 0.0 | 0.0 | 0.0 | 0.0 | 0.0 | 0.0 | 0.1 | 0.1 | 0.0 | 0.0 | 0.0 | 0.0 | 0.0 | 0.0 | 0.0 | 0.0 | 0.0 | 0.0 |
| 174 | 0.0 | 0.0 | 0.0 | 0.0 | 0.1 | 0.1 | 0.0 | 0.0 | 0.0 | 0.0 | 0.0 | 0.0 | 0.0 | 0.0 | 0.0 | 0.0 | 0.0 | 0.0 |
| 175 | 0.0 | 0.0 | 0.0 | 0.0 | 0.0 | 0.0 | 0.0 | 0.0 | 0.0 | 0.0 | 4.5 | 4.5 | 9.5 | 5.8 | 11.4 | 7.3 | 9.1 | 6.0 |
| 176 | 16.8 | 4.7 | 16.1 | 5.2 | 16.1 | 4.3 | 12.9 | 6.5 | 16.2 | 8.5 | 15.5 | 6.5 | 6.7 | 2.8 | 8.7 | 5.2 | 18.1 | 8.0 |
| 177 | 2.3 | 1.9 | 5.0 | 4.1 | 2.9 | 2.9 | 9.9 | 9.6 | 0.0 | 0.0 | 5.7 | 5.7 | 0.8 | 0.8 | 1.2 | 1.2 | 0.0 | 0.0 |
| 178 | 0.0 | 0.0 | 0.0 | 0.0 | 0.0 | 0.0 | 0.0 | 0.0 | 0.0 | 0.0 | 0.0 | 0.0 | 0.0 | 0.0 | 0.0 | 0.0 | 0.0 | 0.0 |
| 179 | 0.0 | 0.0 | 0.0 | 0.0 | 0.0 | 0.0 | 0.1 | 0.1 | 0.0 | 0.0 | 0.0 | 0.0 | 0.2 | 0.2 | 0.0 | 0.0 | 0.4 | 0.3 |
| 180 | 0.0 | 0.0 | 0.0 | 0.0 | 0.0 | 0.0 | 0.0 | 0.0 | 0.0 | 0.0 | 0.0 | 0.0 | 0.0 | 0.0 | 0.0 | 0.0 | 0.0 | 0.0 |
| 181 | 3.1 | 2.7 | 0.0 | 0.0 | 0.0 | 0.0 | 0.1 | 0.1 | 0.3 | 0.3 | 0.4 | 0.4 | 1.3 | 1.3 | 0.5 | 0.5 | 0.0 | 0.0 |
| 182 | 1.4 | 0.4 | 2.5 | 0.9 | 1.4 | 1.0 | 0.5 | 0.3 | 2.5 | 1.0 | 1.8 | 0.5 | 3.5 | 1.2 | 2.8 | 1.2 | 4.3 | 2.6 |
| 183 | 0.0 | 0.0 | 0.0 | 0.0 | 0.4 | 0.4 | 0.0 | 0.0 | 0.0 | 0.0 | 0.0 | 0.0 | 0.0 | 0.0 | 0.0 | 0.0 | 0.0 | 0.0 |
| 193 | 0.0 | 0.0 | 0.0 | 0.0 | 0.0 | 0.0 | 0.0 | 0.0 | 0.0 | 0.0 | 0.0 | 0.0 | 0.0 | 0.0 | 0.0 | 0.0 | 0.0 | 0.0 |
| 195 | 0.0 | 0.0 | 0.0 | 0.0 | 0.0 | 0.0 | 0.0 | 0.0 | 0.0 | 0.0 | 0.0 | 0.0 | 0.0 | 0.0 | 0.0 | 0.0 | 0.0 | 0.0 |

**Table S1.** *Cont*.

| 199 | 0.0 | 0.0 | 0.0 | 0.0 | 0.0 | 0.0 | 0.0 | 0.0 | 0.0 | 0.0 | 0.0 | 0.0 | 0.0 | 0.0 | 0.0 | 0.0 | 0.1 | 0.1 |
| --- | --- | --- | --- | --- | --- | --- | --- | --- | --- | --- | --- | --- | --- | --- | --- | --- | --- | --- |
| 200 | 0.0 | 0.0 | 0.0 | 0.0 | 0.0 | 0.0 | 0.0 | 0.0 | 0.0 | 0.0 | 0.1 | 0.1 | 0.0 | 0.0 | 0.0 | 0.0 | 0.0 | 0.0 |
| 211 | 0.0 | 0.0 | 0.0 | 0.0 | 0.0 | 0.0 | 0.0 | 0.0 | 0.0 | 0.0 | 0.0 | 0.0 | 0.0 | 0.0 | 0.0 | 0.0 | 0.0 | 0.0 |
| 217 | 0.0 | 0.0 | 0.0 | 0.0 | 0.0 | 0.0 | 0.1 | 0.1 | 0.0 | 0.0 | 0.0 | 0.0 | 0.0 | 0.0 | 0.0 | 0.0 | 0.0 | 0.0 |
| 220 | 0.2 | 0.2 | 2.0 | 1.3 | 1.1 | 1.0 | 0.2 | 0.2 | 1.6 | 0.6 | 11.6 | 6.3 | 0.2 | 0.1 | 2.1 | 1.5 | 1.0 | 0.2 |
| 221 | 1.3 | 0.3 | 0.1 | 0.1 | 3.6 | 2.3 | 0.1 | 0.1 | 0.0 | 0.0 | 0.8 | 0.8 | 2.2 | 1.4 | 0.1 | 0.1 | 0.0 | 0.0 |
| 225 | 0.0 | 0.0 | 0.1 | 0.1 | 0.0 | 0.0 | 0.0 | 0.0 | 0.0 | 0.0 | 0.0 | 0.0 | 0.0 | 0.0 | 0.0 | 0.0 | 0.0 | 0.0 |
| 226 | 0.0 | 0.0 | 0.0 | 0.0 | 0.0 | 0.0 | 0.0 | 0.0 | 0.1 | 0.1 | 0.1 | 0.1 | 0.1 | 0.1 | 0.0 | 0.0 | 0.0 | 0.0 |
| 227 | 0.0 | 0.0 | 0.0 | 0.0 | 0.0 | 0.0 | 0.0 | 0.0 | 0.0 | 0.0 | 0.0 | 0.0 | 0.0 | 0.0 | 0.0 | 0.0 | 0.0 | 0.0 |
| 228 | 0.0 | 0.0 | 0.0 | 0.0 | 0.0 | 0.0 | 0.0 | 0.0 | 0.0 | 0.0 | 0.0 | 0.0 | 0.0 | 0.0 | 0.0 | 0.0 | 0.0 | 0.0 |
| 230 | 0.0 | 0.0 | 0.0 | 0.0 | 0.0 | 0.0 | 0.0 | 0.0 | 0.0 | 0.0 | 0.0 | 0.0 | 0.0 | 0.0 | 0.0 | 0.0 | 0.0 | 0.0 |
| 234 | 0.0 | 0.0 | 0.0 | 0.0 | 0.0 | 0.0 | 0.0 | 0.0 | 0.0 | 0.0 | 0.0 | 0.0 | 0.0 | 0.0 | 0.0 | 0.0 | 0.0 | 0.0 |
| 237 | 0.0 | 0.0 | 0.2 | 0.2 | 0.0 | 0.0 | 0.0 | 0.0 | 0.0 | 0.0 | 0.0 | 0.0 | 0.0 | 0.0 | 0.0 | 0.0 | 0.3 | 0.2 |
| 238 | 1.5 | 0.8 | 0.2 | 0.2 | 0.8 | 0.4 | 0.6 | 0.4 | 4.1 | 3.0 | 0.7 | 0.7 | 0.3 | 0.1 | 0.4 | 0.2 | 0.0 | 0.0 |
| 239 | 0.1 | 0.1 | 0.0 | 0.0 | 0.0 | 0.0 | 0.5 | 0.5 | 0.1 | 0.1 | 0.0 | 0.0 | 0.1 | 0.1 | 0.0 | 0.0 | 0.0 | 0.0 |
| 240 | 0.0 | 0.0 | 0.0 | 0.0 | 0.0 | 0.0 | 0.1 | 0.1 | 0.0 | 0.0 | 0.0 | 0.0 | 0.0 | 0.0 | 0.1 | 0.1 | 0.0 | 0.0 |
| 250 | 0.0 | 0.0 | 0.0 | 0.0 | 0.0 | 0.0 | 0.0 | 0.0 | 0.0 | 0.0 | 0.0 | 0.0 | 0.0 | 0.0 | 0.0 | 0.0 | 0.0 | 0.0 |
| 253 | 0.0 | 0.0 | 0.0 | 0.0 | 0.0 | 0.0 | 0.0 | 0.0 | 0.0 | 0.0 | 0.0 | 0.0 | 0.0 | 0.0 | 0.0 | 0.0 | 0.0 | 0.0 |
| 269 | 0.0 | 0.0 | 0.0 | 0.0 | 0.0 | 0.0 | 0.0 | 0.0 | 0.0 | 0.0 | 0.0 | 0.0 | 0.0 | 0.0 | 0.0 | 0.0 | 0.0 | 0.0 |
| 275 | 0.0 | 0.0 | 0.0 | 0.0 | 0.0 | 0.0 | 0.0 | 0.0 | 0.0 | 0.0 | 0.0 | 0.0 | 0.0 | 0.0 | 0.0 | 0.0 | 0.0 | 0.0 |
| 287 | 0.0 | 0.0 | 0.0 | 0.0 | 0.0 | 0.0 | 0.0 | 0.0 | 0.0 | 0.0 | 0.0 | 0.0 | 0.0 | 0.0 | 0.0 | 0.0 | 0.0 | 0.0 |
| 288 | 0.0 | 0.0 | 0.0 | 0.0 | 0.0 | 0.0 | 0.0 | 0.0 | 0.0 | 0.0 | 0.0 | 0.0 | 0.0 | 0.0 | 0.0 | 0.0 | 0.0 | 0.0 |
| 289 | 0.0 | 0.0 | 0.0 | 0.0 | 0.0 | 0.0 | 0.0 | 0.0 | 0.0 | 0.0 | 0.0 | 0.0 | 0.0 | 0.0 | 0.0 | 0.0 | 0.0 | 0.0 |
| 292 | 0.1 | 0.1 | 0.0 | 0.0 | 0.0 | 0.0 | 0.2 | 0.2 | 0.2 | 0.1 | 0.0 | 0.0 | 0.1 | 0.0 | 0.0 | 0.0 | 0.0 | 0.0 |
| 293 | 0.0 | 0.0 | 0.0 | 0.0 | 0.0 | 0.0 | 0.0 | 0.0 | 0.1 | 0.1 | 0.0 | 0.0 | 0.0 | 0.0 | 0.0 | 0.0 | 0.0 | 0.0 |
| 297 | 0.0 | 0.0 | 0.0 | 0.0 | 0.0 | 0.0 | 0.0 | 0.0 | 0.1 | 0.0 | 0.0 | 0.0 | 0.0 | 0.0 | 0.0 | 0.0 | 0.0 | 0.0 |
| 298 | 0.1 | 0.0 | 0.0 | 0.0 | 0.0 | 0.0 | 0.0 | 0.0 | 0.0 | 0.0 | 0.0 | 0.0 | 0.0 | 0.0 | 0.1 | 0.0 | 0.0 | 0.0 |
| 299 | 0.0 | 0.0 | 0.0 | 0.0 | 0.0 | 0.0 | 0.0 | 0.0 | 0.0 | 0.0 | 0.0 | 0.0 | 0.0 | 0.0 | 0.0 | 0.0 | 0.0 | 0.0 |
| 310 | 0.0 | 0.0 | 0.1 | 0.1 | 0.0 | 0.0 | 0.0 | 0.0 | 0.1 | 0.0 | 0.0 | 0.0 | 0.0 | 0.0 | 0.0 | 0.0 | 0.0 | 0.0 |

**Table S1.** *Cont*.

| 311 | 0.1 | 0.1 | 0.1 | 0.1 | 0.3 | 0.2 | 0.1 | 0.1 | 0.0 | 0.0 | 0.0 | 0.0 | 0.0 | 0.0 | 0.1 | 0.1 | 0.1 | 0.1 |
| --- | --- | --- | --- | --- | --- | --- | --- | --- | --- | --- | --- | --- | --- | --- | --- | --- | --- | --- |
| 312 | 0.0 | 0.0 | 0.0 | 0.0 | 1.1 | 0.5 | 0.0 | 0.0 | 0.5 | 0.5 | 0.2 | 0.1 | 0.3 | 0.3 | 0.0 | 0.0 | 0.6 | 0.3 |
| 315 | 0.0 | 0.0 | 0.0 | 0.0 | 0.0 | 0.0 | 2.4 | 2.4 | 0.2 | 0.2 | 0.0 | 0.0 | 0.0 | 0.0 | 0.0 | 0.0 | 0.0 | 0.0 |
| 316 | 8.5 | 2.8 | 1.2 | 0.8 | 6.5 | 4.6 | 10.4 | 5.1 | 4.9 | 4.7 | 6.3 | 4.2 | 3.4 | 2.1 | 6.9 | 6.9 | 3.1 | 3.1 |
| 317 | 3.2 | 1.6 | 7.2 | 2.3 | 3.4 | 1.9 | 2.2 | 2.2 | 9.1 | 8.8 | 4.9 | 3.2 | 5.0 | 2.3 | 14.1 | 5.8 | 7.0 | 4.2 |
| 318 | 0.6 | 0.6 | 0.0 | 0.0 | 0.7 | 0.7 | 0.0 | 0.0 | 0.0 | 0.0 | 0.0 | 0.0 | 0.0 | 0.0 | 0.0 | 0.0 | 0.0 | 0.0 |
| 321 | 0.0 | 0.0 | 0.0 | 0.0 | 0.0 | 0.0 | 0.0 | 0.0 | 0.0 | 0.0 | 0.0 | 0.0 | 0.0 | 0.0 | 0.0 | 0.0 | 0.0 | 0.0 |
| 331 | 0.0 | 0.0 | 0.0 | 0.0 | 0.0 | 0.0 | 0.0 | 0.0 | 0.0 | 0.0 | 0.0 | 0.0 | 0.2 | 0.2 | 0.1 | 0.1 | 0.3 | 0.2 |
| 337 | 0.0 | 0.0 | 0.0 | 0.0 | 0.0 | 0.0 | 0.0 | 0.0 | 0.0 | 0.0 | 0.0 | 0.0 | 0.0 | 0.0 | 0.0 | 0.0 | 0.0 | 0.0 |
| 340 | 0.0 | 0.0 | 0.0 | 0.0 | 0.0 | 0.0 | 0.0 | 0.0 | 0.0 | 0.0 | 0.0 | 0.0 | 0.0 | 0.0 | 0.0 | 0.0 | 0.0 | 0.0 |
| 344 | 0.0 | 0.0 | 0.2 | 0.1 | 0.0 | 0.0 | 0.0 | 0.0 | 0.0 | 0.0 | 0.0 | 0.0 | 0.1 | 0.1 | 0.1 | 0.1 | 0.0 | 0.0 |
| 345 | 0.1 | 0.1 | 0.0 | 0.0 | 0.1 | 0.1 | 0.0 | 0.0 | 0.0 | 0.0 | 0.1 | 0.1 | 0.0 | 0.0 | 0.0 | 0.0 | 0.1 | 0.1 |
| 346 | 0.0 | 0.0 | 0.0 | 0.0 | 0.0 | 0.0 | 0.0 | 0.0 | 0.0 | 0.0 | 0.0 | 0.0 | 0.0 | 0.0 | 0.1 | 0.1 | 0.0 | 0.0 |
| 348 | 0.0 | 0.0 | 0.0 | 0.0 | 0.0 | 0.0 | 0.0 | 0.0 | 0.0 | 0.0 | 0.1 | 0.1 | 0.0 | 0.0 | 0.0 | 0.0 | 0.0 | 0.0 |
| 350 | 0.9 | 0.5 | 0.1 | 0.0 | 0.4 | 0.3 | 2.4 | 1.0 | 0.0 | 0.0 | 1.5 | 1.5 | 0.1 | 0.1 | 0.0 | 0.0 | 2.4 | 2.1 |
| 351 | 2.0 | 1.8 | 2.8 | 2.8 | 3.8 | 2.7 | 0.0 | 0.0 | 0.0 | 0.0 | 0.0 | 0.0 | 0.9 | 0.9 | 0.2 | 0.2 | 0.5 | 0.4 |
| 352 | 0.1 | 0.1 | 0.0 | 0.0 | 0.0 | 0.0 | 0.1 | 0.1 | 0.4 | 0.3 | 0.0 | 0.0 | 0.0 | 0.0 | 0.0 | 0.0 | 0.0 | 0.0 |
| 353 | 0.0 | 0.0 | 0.0 | 0.0 | 0.0 | 0.0 | 0.0 | 0.0 | 0.0 | 0.0 | 0.1 | 0.1 | 0.0 | 0.0 | 0.0 | 0.0 | 0.0 | 0.0 |
| 354 | 0.0 | 0.0 | 0.0 | 0.0 | 0.1 | 0.1 | 0.0 | 0.0 | 0.0 | 0.0 | 0.0 | 0.0 | 0.0 | 0.0 | 0.0 | 0.0 | 0.0 | 0.0 |
| 355 | 0.8 | 0.8 | 0.0 | 0.0 | 1.2 | 1.2 | 0.0 | 0.0 | 0.0 | 0.0 | 3.1 | 3.1 | 1.9 | 1.9 | 0.0 | 0.0 | 0.0 | 0.0 |
| 356 | 12.2 | 5.2 | 2.0 | 2.0 | 15.0 | 4.7 | 19.1 | 4.8 | 14.5 | 6.7 | 1.9 | 1.9 | 6.4 | 4.2 | 6.7 | 2.6 | 4.8 | 4.8 |
| 357 | 1.8 | 1.2 | 15.0 | 3.9 | 3.0 | 1.5 | 0.0 | 0.0 | 5.2 | 5.2 | 15.0 | 6.2 | 8.1 | 4.8 | 8.5 | 5.4 | 21.1 | 7.8 |
| 358 | 0.0 | 0.0 | 0.0 | 0.0 | 0.0 | 0.0 | 0.0 | 0.0 | 0.0 | 0.0 | 0.0 | 0.0 | 0.0 | 0.0 | 1.9 | 1.9 | 0.0 | 0.0 |
| 360 | 0.5 | 0.5 | 0.0 | 0.0 | 1.4 | 1.4 | 2.3 | 1.5 | 2.9 | 2.9 | 0.0 | 0.0 | 1.7 | 1.7 | 0.0 | 0.0 | 0.0 | 0.0 |

**Table S2.** Variability of environmental parameters at three depth intervals (cm) in each nutrient treatment (Ctrl: control; N: Fertilized with nitrogen; P: Fertilized with phosphorus). See text for details on the fertilization experiment. Data shown as Avg. ± SE; N ≥ 3.

|  |  | **Ctrl** |  |  | **N** |  |  | **P** |  |
| --- | --- | --- | --- | --- | --- | --- | --- | --- | --- |
| **Parameters** | **0–5 cm** | **5–10 cm** | **20–30 cm** | **0–5 cm** | **5–10 cm** | **20–30 cm** | **0–5 cm** | **5–10 cm** | **20–30 cm** |
| **pH** | 6.12 | 6.12 | 6.18 | 6.48 | 6.35 | 6.52 | 6.30 | 6.14 | 6.25 |
|  | (0.19) | (0.14) | (0.11) | (0.06) | (0.04) | (0.08) | (0.1) | (0.03) | (0.04) |
| **Temp. (°C)** | 34.4 | 34.2 | 34.4 | 32.5 | 32.8 | 33.2 | 32.1 | 31.6 | 32.3 |
|  | (0.7) | (0.5) | (0.4) | (0.6) | (0.4) | (0.5) | (0.6) | (0.4) | (0.4) |
| **Salinity (ppt)** | 42.9 | 40.4 | 42.2 | 40.4 | 40.3 | 43.6 | 42.4 | 41.4 | 42.7 |
|  | (1.2) | (1.1) | (0.5) | (1.1) | (0.7) | (0.3) | (1.6) | (1.1) | (0.4) |
| **H2S (mM)** | 0.37 | 0.72 | 1.34 | 0.25 | 0.39 | 2.42 | 0.33 | 0.39 | 0.41 |
|  | (0.09) | (0.18) | (0.17) | (0.04) | (0.06) | (0.62) | (0.07) | (0.09) | (0.03) |
| **PO43+ (μM)** | 0.70 | 1.18 | 0.95 | 0.44 | 0.73 | 0.85 | 41.58 | 110.79 | 248.62 |
|  | (0.08) | (0.29) | (0.08) | (0.12) | (0.05) | (0.2) | (11.87) | (13.23) | (49.52) |
| **NH4+ (μM)** | 54.39 | 65.95 | 68.95 | 106.44 | 403.70 | 1811.31 | 59.48 | 48.81 | 62.81 |
|  | (4.52) | (6.78) | (10.15) | (29.35) | (117.17) | (623.47) | (12.12) | (4.16) | (4.98) |
| **N:P (molar)** | 103.1 | 59.9 | 59.7 | 362.4 | 717.3 | 3571.9 | 3.0 | 0.5 | 0.3 |
|  | (15.8) | (10.3) | (7.8) | (160.4) | (254.7) | (1895.1) | (1.8) | (0.1) | (0.1) |
| **Dead roots (%)** | 15.6 | 7.6 | 31.8 | 26.2 | 18.0 | 24.4 | 11.2 | 7.2 | 13.3 |
|  | (2.1) | (1.2) | (7.9) | (11.9) | (6.5) | (1.4) | (5.8) | (3.1) | (8.4) |
| **Live roots (%)** | 12.6 | 22.0 | 10.5 | 13.7 | 16.0 | 6.1 | 59.8 | 20.0 | 7.2 |
|  | (2.4) | (0.6) | (4.1) | (7.7) | (0.8) | (4.4) | (0.3) | (4.4) | (4.3) |

**Figure S1.** Neighbor-joining tree showing inferred phylogenetic relationships of *nifH* gene (amino acid sequences) cloned from Belizean mangrove sediments (shown in blue). Bootstrap values (≥40%) for 1000 replicates are indicated above the branches and *Synechococcus elongatus* was used as outgroup. Letters in the clones ID refer to the nutrient treatment where the clone was found (control: Ctrl, phosphorus: P, and nitrogen: N).

**Figure S2.** Cluster analysis (Euclidian distance) of TRFLP-OTUs from Table S2. Distance coefficients are shown in each cluster. Nutrient (control: Ctrl, phosphorus: P, and nitrogen: N) and sediment depth (0–5 cm, 5–10 cm, 20–30 cm) treatments are shown on the left.

© 2015 by the authors; licensee MDPI, Basel, Switzerland. This article is an open access article distributed under the terms and conditions of the Creative Commons Attribution license (http://creativecommons.org/licenses/by/4.0/).
